# Supplementary material for: SOX11 contributes to the regulation of GDF5 in joint maintenance
Source: PubMed Central journal article supplement (PMC3760452; doi:10.1186/1471-213x-13-4), 2013-01-29
Supplement: 1471-213X-13-4-S5.pdf [file 1471-213X-13-4-S5.pdf]

|                 |   |   |   |   |
|-----------------|---|---|---|---|
| SOX11           | - | + | + | + |
| Normal IgG      | - | - | + | - |
| $\alpha$ -SOX11 | - | - | - | + |

▶  
▷

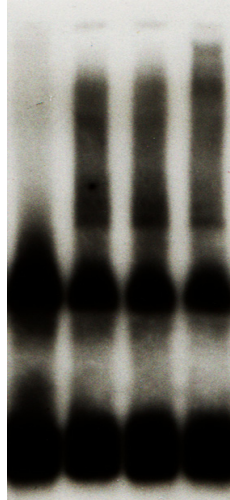

**Figure S5.**
