# Supplementary material for: SOX11 contributes to the regulation of GDF5 in joint maintenance
Source: PubMed Central journal article supplement (PMC3760452; doi:10.1186/1471-213x-13-4), 2013-01-29
Supplement: 1471-213X-13-4-S6.pdf [file 1471-213X-13-4-S6.pdf]

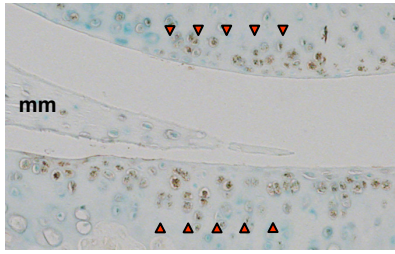

Center of weight bearing area  
(medial joint)

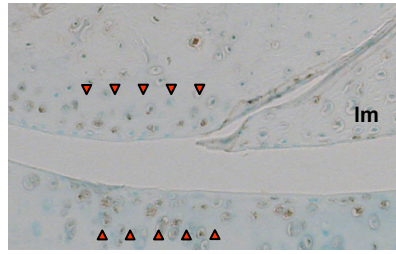

Center of weight bearing area  
(lateral joint)

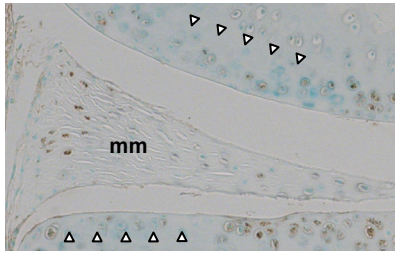

Peripheral weight bearing area

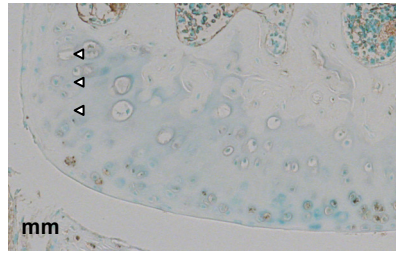

Edge of femoral condyle

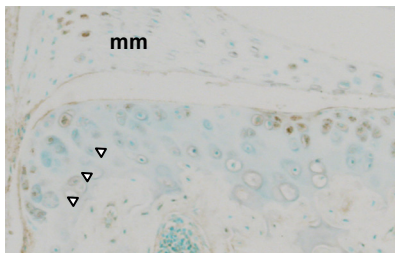

Edge of tibial plateau

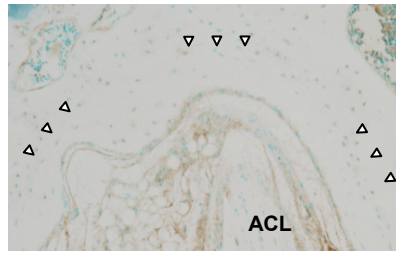

Intercondylar cartilage in femur

Figure S6.
