# Supplementary material for: SOX11 contributes to the regulation of GDF5 in joint maintenance
Source: PubMed Central journal article supplement (PMC3760452; doi:10.1186/1471-213x-13-4), 2013-01-29
Supplement: 1471-213X-13-4-S8.pdf [file 1471-213X-13-4-S8.pdf]

**Cartilage degradation  
(Modified Mankin Score)**

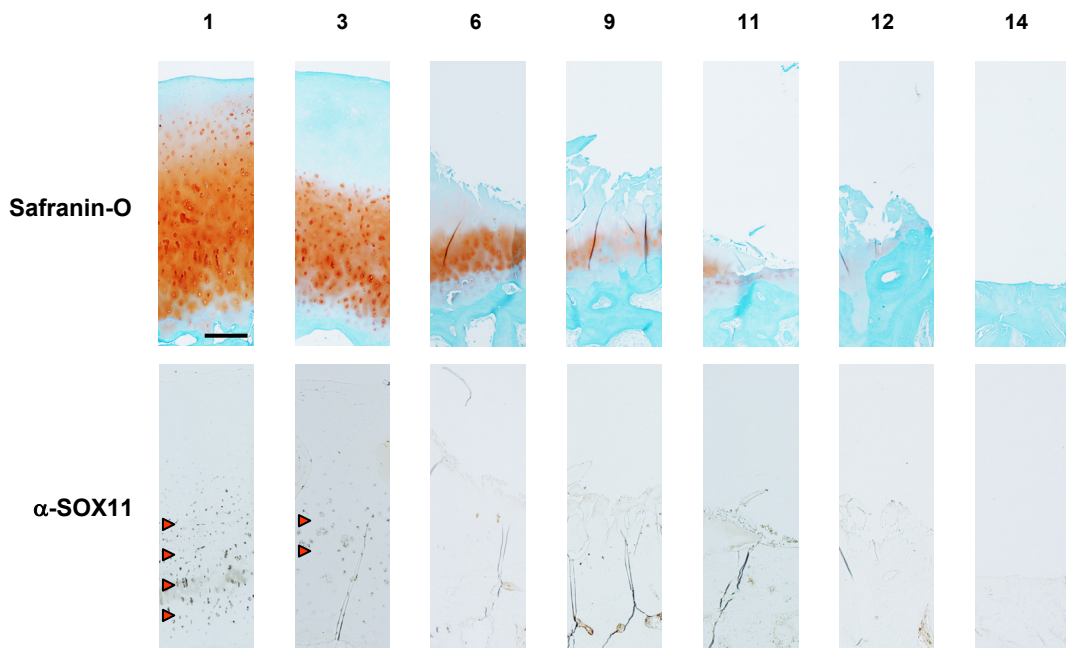

**Figure S8.**
